# Supplementary material for: Deep Learning Based Drug Screening for Novel Coronavirus 2019-nCov
Source: Preprints.org preprint supplement (doi:10.20944/preprints202002.0061.v1), 2020-02-05

Table S1. *We gratefully acknowledge the Authors, the Originating and Submitting Laboratories for their sequence and metadata shared through GISAID, on which this research is based. All submitters of data may be contacted directly via* ***www.gisaid.org***

| **Accession ID** | **Virus name** | **Location** | **Collection date** | **Originating lab** | **Submitting lab** | **Authors** |  |  |
| --- | --- | --- | --- | --- | --- | --- | --- | --- |
| [EPI_ISL_404227](https://platform.gisaid.org/epi3/start/CoV2020) | BetaCoV/Zhejiang/WZ-01/2020 | Zhejiang, China | 2020-01-16 | Zhejiang Provincial Center for Disease Control and Prevention | Department of Microbiology, Zhejiang Provincial Center for Disease Control and Prevention | Yin Chen, Yanjun Zhang, Haiyan Mao, Junhang Pan, Xiuyu Lou, Yiyu Lu, Juying Yan, Hanping Zhu, Jian Gao, Yan Feng, Yi Sun, Hao Yan, Zhen Li, Yisheng Sun, Liming Gong, Qiong Ge, Wen Shi, Xinying Wang, Wenwu Yao, Zhangnv Yang, Fang Xu, Chen Chen, Enfu Chen, Zhen Wang, Zhiping Chen, Jianmin Jiang, Chonggao Hu | | |
| [EPI_ISL_404228](https://platform.gisaid.org/epi3/start/CoV2020) | BetaCoV/Zhejiang/WZ-02/2020 | Zhejiang, China | 2020-01-17 | Zhejiang Provincial Center for Disease Control and Prevention | Department of Microbiology, Zhejiang Provincial Center for Disease Control and Prevention | Yanjun Zhang, Yin Chen, Haiyan Mao, Junhang Pan, Xiuyu Lou, Yiyu Lu, Juying Yan, Hanping Zhu, Jian Gao, Yan Feng, Yi Sun, Hao Yan, Zhen Li, Yisheng Sun, Liming Gong, Qiong Ge, Wen Shi, Xinying Wang, Wenwu Yao, Zhangnv Yang, Fang Xu, Chen Chen, Enfu Chen, Zhen Wang, Zhiping Chen, Jianmin Jiang, Chonggao Hu | | |
| [EPI_ISL_402132](https://platform.gisaid.org/epi3/start/CoV2020) | BetaCoV/Wuhan/HBCDC-HB-01/2019 | China/Hubei Province | 2019-12-30 | Wuhan Jinyintan Hospital | Hubei Provincial Center for Disease Control and Prevention | Bin Fang, Xiang Li, Xiao Yu, Linlin Liu, Bo Yang, Faxian Zhan, Guojun Ye, Xixiang Huo, Junqiang Xu, Bo Yu, Kun Cai, Jing Li, Yongzhong Jiang. | | |
| [EPI_ISL_402127](https://platform.gisaid.org/epi3/start/CoV2020) | BetaCoV/Wuhan/WIV02/2019 | China / Hubei Province / Wuhan City | 2019-12-30 | Wuhan Jinyintan Hospital | Wuhan Institute of Virology, Chinese Academy of Sciences | Peng Zhou, Xing-Lou Yang, Ding-Yu Zhang, Lei Zhang, Yan Zhu, Hao-Rui Si, Zhengli Shi | |  |
| [EPI_ISL_402128](https://platform.gisaid.org/epi3/start/CoV2020) | BetaCoV/Wuhan/WIV05/2019 | China / Hubei Province / Wuhan City | 2019-12-30 | Wuhan Jinyintan Hospital | Wuhan Institute of Virology, Chinese Academy of Sciences | Peng Zhou, Xing-Lou Yang, Ding-Yu Zhang, Lei Zhang, Yan Zhu, Hao-Rui Si, Zhengli Shi | |  |
| [EPI_ISL_402129](https://platform.gisaid.org/epi3/start/CoV2020) | BetaCoV/Wuhan/WIV06/2019 | China / Hubei Province / Wuhan City | 2019-12-30 | Wuhan Jinyintan Hospital | Wuhan Institute of Virology, Chinese Academy of Sciences | Peng Zhou, Xing-Lou Yang, Ding-Yu Zhang, Lei Zhang, Yan Zhu, Hao-Rui Si, Zhengli Shi | |  |
| [EPI_ISL_402130](https://platform.gisaid.org/epi3/start/CoV2020) | BetaCoV/Wuhan/WIV07/2019 | China / Hubei Province / Wuhan City | 2019-12-30 | Wuhan Jinyintan Hospital | Wuhan Institute of Virology, Chinese Academy of Sciences | Peng Zhou, Xing-Lou Yang, Ding-Yu Zhang, Lei Zhang, Yan Zhu, Hao-Rui Si, Zhengli Shi | |  |
| [EPI_ISL_402126](https://platform.gisaid.org/epi3/start/CoV2020) | BetaCoV/Kanagawa/1/2020 | Kanagawa Prefecture, Japan | 2020-01-14 | Dept. of Virology III, National Institute of Infectious Diseases | Dept. of Virology III, National Institute of Infectious Diseases | Naganori Nao, Kazuya Shirato, Shutoku Matsuyama, Makoto Takeda |  |  |
| [EPI_ISL_403963](https://platform.gisaid.org/epi3/start/CoV2020) | BetaCoV/Nonthaburi/74/2020 | Thailand/ Nonthaburi Province | 2020-01-13 | Bamrasnaradura Hospital | 1. Department of Medical Sciences, Ministry of Public Health, Thailand 2. Thai Red Cross Emerging Infectious Diseases - Health Science Centre 3. Department of Disease Control, Ministry of Public Health, Thailand | Pilailuk,Okada; Siripaporn,Phuygun; Thanutsapa,Thanadachakul; Supaporn,Wacharapluesadee; Sittiporn,Parnmen; Warawan,Wongboot; Sunthareeya,Waicharoen; Rome,Buathong; Malinee,Chittaganpitch; Nanthawan,Mekha | | |
| [EPI_ISL_403962](https://platform.gisaid.org/epi3/start/CoV2020) | BetaCoV/Nonthaburi/61/2020 | Thailand/ Nonthaburi Province | 2020-01-08 | Bamrasnaradura Hospital | 1. Department of Medical Sciences, Ministry of Public Health, Thailand 2. Thai Red Cross Emerging Infectious Diseases - Health Science Centre 3. Department of Disease Control, Ministry of Public Health, Thailand | Pilailuk,Okada; Siripaporn,Phuygun; Thanutsapa,Thanadachakul; Supaporn,Wacharapluesadee; Sittiporn,Parnmen; Warawan,Wongboot; Sunthareeya,Waicharoen; Rome,Buathong; Malinee,Chittaganpitch; Nanthawan,Mekha | | |
| [EPI_ISL_402120](https://platform.gisaid.org/epi3/start/CoV2020) | BetaCoV/Wuhan/IVDC-HB-04/2020 | China / Hubei Province / Wuhan City | 2020-01-01 | National Institute for Viral Disease Control and Prevention, China CDC | National Institute for Viral Disease Control and Prevention, China CDC | Wenjie Tan，Xiang Zhao，Wenling Wang，Xuejun Ma，Yongzhong Jiang，Roujian Lu，Ji Wang，Weimin Zhou，Peihua Niu，Peipei Liu，Faxian Zhan，Weifeng Shi，Baoying Huang，Jun Liu，Li Zhao，Yao Meng，Xiaozhou He，Fei Ye，Na Zhu，Yang Li，Jing Chen，Wenbo Xu，George F. Gao，Guizhen Wu | | |
| [EPI_ISL_402119](https://platform.gisaid.org/epi3/start/CoV2020) | BetaCoV/Wuhan/IVDC-HB-01/2019 | China / Hubei Province / Wuhan City | 2019-12-30 | National Institute for Viral Disease Control and Prevention, China CDC | National Institute for Viral Disease Control and Prevention, China CDC | Wenjie Tan，Xiang Zhao，Wenling Wang，Xuejun Ma，Yongzhong Jiang，Roujian Lu, Ji Wang, Weimin Zhou，Peihua Niu，Peipei Liu，Faxian Zhan，Weifeng Shi，Baoying Huang，Jun Liu，Li Zhao，Yao Meng，Xiaozhou He，Fei Ye，Na Zhu，Yang Li，Jing Chen，Wenbo Xu，George F. Gao，Guizhen Wu | | |
| [EPI_ISL_402121](https://platform.gisaid.org/epi3/start/CoV2020) | BetaCoV/Wuhan/IVDC-HB-05/2019 | China / Hubei Province / Wuhan City | 2019-12-30 | National Institute for Viral Disease Control and Prevention, China CDC | National Institute for Viral Disease Control and Prevention, China CDC | Wenjie Tan，Xuejun Ma，Xiang Zhao，Wenling Wang，Yongzhong Jiang，Roujian Lu，Ji Wang，Peihua Niu, Weimin Zhou, Faxian Zhan，Weifeng Shi，Baoying Huang，Jun Liu，Li Zhao，Yao Meng，Fei Ye，Na Zhu, Xiaozhou He，Peipei Liu, Yang Li，Jing Chen，Wenbo Xu，George F. Gao，Guizhen Wu | | |
| [EPI_ISL_402124](https://platform.gisaid.org/epi3/start/CoV2020) | BetaCoV/Wuhan/WIV04/2019 | China / Hubei Province / Wuhan City | 2019-12-30 | Wuhan Jinyintan Hospital | Wuhan Institute of Virology, Chinese Academy of Sciences | Peng Zhou, Xing-Lou Yang, Ding-Yu Zhang, Lei Zhang, Yan Zhu, Hao-Rui Si, Zhengli Shi | |  |
| [EPI_ISL_402123](https://platform.gisaid.org/epi3/start/CoV2020) | BetaCoV/Wuhan/IPBCAMS-WH-01/2019 | China / Hubei Province / Wuhan City | 2019-12-24 | Institute of Pathogen Biology, Chinese Academy of Medical Sciences & Peking Union Medical College | Institute of Pathogen Biology, Chinese Academy of Medical Sciences & Peking Union Medical College | Lili Ren, Jianwei Wang, Qi Jin, Zichun Xiang, Yongjun Li, Zhiqiang Wu, Chao Wu, Yiwei Liu | |  |
| [EPI_ISL_402125](https://platform.gisaid.org/epi3/start/CoV2020) | BetaCoV/Wuhan-Hu-1/2019 | China | 2019-12 | unknown | National Institute for Communicable Disease Control and Prevention (ICDC) Chinese Center for Disease Control and Prevention (China CDC) | Zhang,Y.-Z., Wu,F., Chen,Y.-M., Pei,Y.-Y., Xu,L., Wang,W., Zhao,S., Yu,B., Hu,Y., Tao,Z.-W., Song,Z.-G., Tian,J.-H., Zhang,Y.-L., Liu,Y., Zheng,J.-J., Dai,F.-H., Wang,Q.-M., She,J.-L. and Zhu,T.-Y. | | |
| [EPI_ISL_403931](https://platform.gisaid.org/epi3/start/CoV2020) | BetaCoV/Wuhan/IPBCAMS-WH-02/2019 | China / Hubei Province / Wuhan City | 2019-12-30 | Institute of Pathogen Biology, Chinese Academy of Medical Sciences & Peking Union Medical College | Institute of Pathogen Biology, Chinese Academy of Medical Sciences & Peking Union Medical College | Lili Ren, Jianwei Wang, Qi Jin, Zichun Xiang, Yongjun Li, Zhiqiang Wu, Chao Wu, Yiwei Liu | |  |
| [EPI_ISL_403928](https://platform.gisaid.org/epi3/start/CoV2020) | BetaCoV/Wuhan/IPBCAMS-WH-05/2020 | China / Hubei Province / Wuhan City | 2020-01-01 | Institute of Pathogen Biology, Chinese Academy of Medical Sciences & Peking Union Medical College | Institute of Pathogen Biology, Chinese Academy of Medical Sciences & Peking Union Medical College | Lili Ren, Jianwei Wang, Qi Jin, Zichun Xiang, Yongjun Li, Zhiqiang Wu, Chao Wu, Yiwei Liu | |  |
| [EPI_ISL_403930](https://platform.gisaid.org/epi3/start/CoV2020) | BetaCoV/Wuhan/IPBCAMS-WH-03/2019 | China / Hubei Province / Wuhan City | 2019-12-30 | Institute of Pathogen Biology, Chinese Academy of Medical Sciences & Peking Union Medical College | Institute of Pathogen Biology, Chinese Academy of Medical Sciences & Peking Union Medical College | Lili Ren, Jianwei Wang, Qi Jin, Zichun Xiang, Yongjun Li, Zhiqiang Wu, Chao Wu, Yiwei Liu | |  |
| [EPI_ISL_403929](https://platform.gisaid.org/epi3/start/CoV2020) | BetaCoV/Wuhan/IPBCAMS-WH-04/2019 | China / Hubei Province / Wuhan City | 2019-12-30 | Institute of Pathogen Biology, Chinese Academy of Medical Sciences & Peking Union Medical College | Institute of Pathogen Biology, Chinese Academy of Medical Sciences & Peking Union Medical College | Lili Ren, Jianwei Wang, Qi Jin, Zichun Xiang, Yongjun Li, Zhiqiang Wu, Chao Wu, Yiwei Liu | |  |

Table S2. Shows top 100 prediction by DFCNN score in Chemdiv dataset for 2019-nCov_main_protease.

| Chimdiv ID | DFCNN score |
| --- | --- |
| 8017-4328 | 0.999728 |
| 8017-4325 | 0.999653 |
| 8002-7777 | 0.999626 |
| 8004-0123 | 0.99958 |
| 8010-0095 | 0.999463 |
| 4328-0108 | 0.999458 |
| 8019-0727 | 0.999451 |
| 8017-3508 | 0.99945 |
| K652-0038 | 0.999448 |
| 8007-1171 | 0.999437 |
| 8014-7167 | 0.999428 |
| F482-1022 | 0.999403 |
| 8005-4605 | 0.999393 |
| 8008-1974 | 0.999392 |
| 4061-0002 | 0.999377 |
| S831-1523 | 0.999376 |
| V004-9685 | 0.999369 |
| 5989-3029 | 0.999364 |
| V009-8046 | 0.999359 |
| 4877-0055 | 0.999347 |
| 0560-0003 | 0.999337 |
| T001-2234 | 0.999333 |
| 8004-7446 | 0.99933 |
| 8007-5743 | 0.99931 |
| 8005-9352 | 0.99931 |
| 8003-6937 | 0.999301 |
| 1601-0143 | 0.999296 |
| 1616-0081 | 0.999289 |
| K248-0154 | 0.99928 |
| 2410-0027 | 0.999276 |
| 4772-0421 | 0.999274 |
| 3902-0425 | 0.99927 |
| D128-0543 | 0.99926 |
| 8007-4545 | 0.999258 |
| 0896-4289 | 0.999254 |
| C685-0548 | 0.999249 |
| 2410-0023 | 0.999235 |
| 3902-0426 | 0.999227 |
| D128-0506 | 0.999223 |
| V006-0721 | 0.999221 |
| 8006-5663 | 0.999211 |
| V013-3313 | 0.999211 |
| 2254-0082 | 0.999201 |
| 2095-0020 | 0.999197 |
| F916-0646 | 0.99919 |
| 3284-1168 | 0.999188 |
| 2449-0127 | 0.999185 |
| 1464-0245 | 0.999175 |
| 0896-3782 | 0.999166 |
| 3731-0092 | 0.999164 |
| 8019-0711 | 0.999161 |
| 3284-0199 | 0.999152 |
| S831-1213 | 0.99915 |
| 8007-3598 | 0.999139 |
| 8007-4696 | 0.999139 |
| 0173-0037 | 0.999138 |
| 0717-0937 | 0.999128 |
| 4328-0070 | 0.999127 |
| 4328-0093 | 0.999127 |
| 8002-4214 | 0.999121 |
| 8003-6960 | 0.999118 |
| 2556-1943 | 0.999117 |
| V009-8055 | 0.999113 |
| 4157-2785 | 0.999108 |
| 8003-1260 | 0.999107 |
| 8002-4209 | 0.999107 |
| 8003-5821 | 0.999103 |
| 0896-2219 | 0.999102 |
| 0278-0047 | 0.999097 |
| 4554-4705 | 0.999095 |
| 8004-6897 | 0.999095 |
| 8013-2243 | 0.99909 |
| 0134-0060 | 0.999087 |
| 2311-0897 | 0.999086 |
| 8005-3477 | 0.999081 |
| 8003-6916 | 0.999078 |
| 4686-0106 | 0.999077 |
| 1761-1802 | 0.999076 |
| K072-0033 | 0.999075 |
| 4994-0410 | 0.999073 |
| K072-0056 | 0.999071 |
| 8008-4879 | 0.99907 |
| 8009-0759 | 0.999067 |
| 4031-1089 | 0.999067 |
| V009-8066 | 0.999067 |
| T001-1976 | 0.999062 |
| 6737-2750 | 0.999057 |
| 8009-4391 | 0.999054 |
| Y032-0855 | 0.999054 |
| V011-3977 | 0.999051 |
| 3902-0703 | 0.999048 |
| 8002-8920 | 0.999048 |
| Y030-3906 | 0.999045 |
| D691-0015 | 0.999045 |
| 2425-4162 | 0.999044 |
| 1761-1584 | 0.999042 |
| 8007-2532 | 0.999041 |
| 1761-1516 | 0.99904 |
| 1683-5937 | 0.999038 |
| V011-8348 | 0.999038 |

**Table S3**. The potential drug candidates (DFCNN score above 0.99) selected from the Targetmol-Natural compound library.

| **Natural Compound** | **DFCNN score** |
| --- | --- |
| Adenosine;Vidarabine;Mannitol;Dulcitol;D-Sorbitol;D-Mannitol;Allitol;Sodium_gluconate | score>=0.999 |
| L(-)-sorbose;D-(-)-Fructose;Guanosine;Inosine;Trichostatin_A;D-(-)-Ribose;DL-Xylose;Cordycepin;β-Glycerophosphate_disodium_salt_hydrate;Xanthosine;Zeatin;N6-methyladenosine;Atractylodin;Tubercidin;Glucosamine_sulfate;Panthenol;Dexpanthenol;Ubenimex;Phospho(enol)pyruvic_acid_monopotassium | 0.999>Score>=0.998 |
| Aztreonam;Cytidine;Cytarabine;D-Saccharic_acid_potassium_salt;D-Glucose_6-phosphate_sodium_salt;Quinic_acid;2'-Deoxyadenosine_monohydrate;N-Sulfo-glucosamine_sodium_salt;2'-Deoxyguanosine_monohydrate | 0.998>Score>=0.997 |
| Decitabine;Thiamine_monophosphate_chloride_dihydrat;L(-)-Carnitine;DL-Carnitine;Inositol;Phosphocholine_chloride_calcium_salt_tet;Mucic_Acid;Sodium_L-ascorbyl-2-phosphate;Glycerophosphocholine;D-(-)-Tagatose | 0.997>Score>=0.996 |
| Cyclocytidine_hydrochloride;D-Glucuronic_acid;Chloramphenicol;Senkyunolide_I;Riboflavin;S-allyl-L-cysteine;Streptozocin;Trans-Zeatin_Riboside | 0.996>Score>=0.995 |
| Phosphoserine;Linalool;Neochlorogenic_acid;Chlorogenic_Acid;D-(+)-Galacturonic_acid;Genipin;N-Acetyl-D-mannosamine;N-Acetyl-D-galactosamine;Pyridoxal_5'-phosphate_hydrate;Sodium_ascorbate | 0.995>Score>=0.994 |
| Delta-Gluconolactone;2'-Deoxyinosine;DL-5-Hydroxylysine_hydrochloride | 0.994>Score>=0.993 |
| Decanoic_Acid;Uridine;2-Deoxy-D-ribose;L-Anserine_nitrate_salt;Uridine_5'-monophosphate | 0.993>Score>=0.992 |
| 10-Hydroxydecanoic_Acid;α-D-Glucose;Mannose;D-Mannose;D(+)-Glucose;D-(+)-ALLOSE;Alpha-D-galactose;Demethoxycurcumin;Pyridoxamine_dihydrochloride;1-Deoxynojirimycin;Nonanoic_acid;Xylitol;Ribitol;L-(-)-Arabitol | 0.992>Score>=0.991 |
| 2'-Deoxycytidine_monohydrate;Griffonin;Voglibose | 0.991>Score>=0.99 |

**Table S4**. The potential drug candidates (DFCNN score >=0.99) selected from the Targetmol-Approved Drug library.

| **Approved Drug name** | **DFCNN score** |
| --- | --- |
| Meglumine;Vidarabine;Adenosine;D-Sorbitol;D-Mannitol;Sodium_gluconate;Ganciclovir;Chlorobutanol | score>=0.999 |
| AICAR_(Acadesine);Mylosar;Inosine;D-Pantothenic_acid_sodium_salt;DL-Xylose;Ethambutol_dihydrochloride;Glucosamine;Myclobutanil;Sodium_etidronate;Fludarabine;Gemcitabine;Emtricitabine;Tubercidin;Bestatin_hydrochloride;Panthenol;Dexpanthenol;Cladribine;Entecavir;Ubenimex | 0.999>Score>=0.998 |
| Entecavir_hydrate;Procarbazine_hydrochloride;Aztreonam;Disopyramide;Benznidazole;Clofarabine;Bucetin;Nifuroxazide;Triflupromazine_hydrochloride;Doxifluridine;Cytarabine;Cefdinir;Bupropion_hydrochloride;Fluoxetine;Tenofovir;Pentostatin;Fluoxetine_hydrochloride;Imazalil;Atenolol | 0.998>Score>=0.997 |
| Dicurone;Anastrozole;Amifostine;Pamidronate_disodium_salt;L(-)-Carnitine;DL-Carnitine;Miglitol;Inositol;Etofibrate;Stiripentol;Cepazine;Aciclovir;Isoprenaline_hydrochloride;Nialamide;Glycerophosphocholine;Rosiglitazone_maleate;Epalrestat;Vorinostat;Bortezomib;Milnacipran_hydrochloride | 0.997>Score>=0.996 |
| Selinexor;Ribavirin;Alprenolol;Nylidrin_hydrochloride;Tulobuterol_hydrochloride;Chloropyramine_hydrochloride;Cyclocytidine_hydrochloride;Levomilnacipran;Carbadox;Chloramphenicol;Prilocaine;Clofibrate;Tropicamide;Riboflavin;Nifuratel;Racecadotril;Clorprenaline_hydrochloride;Carteolol_hydrochloride;Iproniazid_Phosphate;Streptozocin;Alendronate_sodium_hydrate;Climbazole | 0.996>Score>=0.995 |
| Sotalol_hydrochloride;Genipin;Duloxetine_hydrochloride;Flutamide;N-Acetyl-D-Glucosamine;Nicaraven;Propitocaine_hydrochloride;Eflornithine_hydrochloride_Monohydrate;Eprodisate_disodium;Pyridoxal_phosphate | 0.995>Score>=0.994 |
| Chlorophos;Isavuconazole;Famciclovir;Risedronic_Acid;Tannic_acid;Delta-Gluconolactone;Malotilate;Isoxsuprine_hydrochloride;Risedronate_Sodium;Adiphenine_hydrochloride | 0.994>Score>=0.993 |
| Nicorandil;Etofenamate;Delapril_Hydrochloride;Uridine;Esmolol_hydrochloride;Melphalan;Phenoxybenzamine_hydrochloride;Brivudine;Benserazide_hydrochloride;Propranolol_hydrochloride;Rivastigmine;Bufexamac | 0.993>Score>=0.992 |
| Ramipril;D(+)-Glucose;Midodrine_hydrochloride;Fipronil;Atomoxetine_hydrochloride;Salbutamol;Belinostat;Nilutamide;Busulfan;Xylitol;L-Carnitine_hydrochloride | 0.992>Score>=0.991 |
| Thiamphenicol;Cefuroxime_sodium;Clindamycin_HCl;Voglibose;Florfenicol;Florfenicol;Nateglinide;Nitrofurantoin;Valganciclovir_hydrochloride | 0.991>Score>=0.99 |

**Table S5**. The potential drug candidates (DFCNN score >=0.99) selected from the Targetmol-Bioactive compounds.

| **Bioactive Compound** | **DFCNN score** |
| --- | --- |
| Vidarabine;Adenosine;Dulcitol;D-Sorbitol;D-Mannitol;Ganciclovir;5'-DEOXYADENOSINE | score>=0.999 |
| Nelarabine;Tosedostat;Fosfomycin_Tromethamine;AICAR_(Acadesine);Mylosar;Guanosine;Inosine;Crotonoside;D-(-)-Ribose;Cordycepin;β-Glycerophosphate_disodium_salt_hydrate;Zeatin;Ethambutol_dihydrochloride;5-Iodotubercidin;Myclobutanil;Sodium_etidronate;Atractylodin;Fludarabine;Heterophyllin_B;Gemcitabine;Emtricitabine;Disodium_clodronate_tetrahydrate;Ostarine;Tubercidin;Bestatin_hydrochloride;Panthenol;Dexpanthenol;FCCP;Cladribine;Z-VAD(OMe)-FMK;WP1066;Entecavir;Ubenimex;Batimastat;ML264;GSK4112;Degrasyn;Cefcapene_Pivoxil_Hydrochloride;Phospho(enol)pyruvic_acid_monopotassium;A-804598;SR3335;IPTG | 0.999>Score>=0.998 |
| KYA1797K;Mizoribine;5-Hydroxy-1,7-diphenyl-6-hepten-3-one;ATPO;Entecavir_hydrate;Aztreonam;NXY-059;D-Pantothenic_acid;Bay_11-7085;Disopyramide;Benznidazole;SB_297006;Imidafenacin;Clofarabine;Bucetin;Nifuroxazide;Triflupromazine_hydrochloride;Doxifluridine;Selegiline_hydrochloride;Cytarabine;Cytidine;BGP-15;Cefdinir;Bupropion_hydrochloride;UK-371804;Fluoxetine;D-Saccharic_acid_potassium_salt;D-Glucose_6-phosphate_sodium_salt;J147;Tenofovir;N-Sulfo-glucosamine_sodium_salt;Pentostatin;Fluoxetine_hydrochloride;Nifurtimox;Imazalil;5-Fluorouridine;Atenolol;Repertaxin;ACY-738 | 0.998>Score>=0.997 |
| Resminostat_hydrochloride;Decitabine;NSC_405020;Anastrozole;Syk_Inhibitor_II_(hydrochloride);Demeton-s-methyl_sulfone;Thiamine_monophosphate_chloride_dihydrat;Nexturastat_A;Amifostine;Pamidronate_disodium_salt;L(-)-Carnitine;DL-Carnitine;Zebularine;Miglitol;Inositol;Etofibrate;Tyrphostin_9;Oprozomib;Sodium_L-ascorbyl-2-phosphate;Stiripentol;Cepazine;Aciclovir;TFAP;Isoprenaline_hydrochloride;Nialamide;Glycerophosphocholine;Rosiglitazone_maleate;PZM21;Epalrestat;Vorinostat;Tyrphostin_AG_879;TOS-ARG-OME_hydrochloride;Bortezomib;Milnacipran_hydrochloride | 0.997>Score>=0.996 |
| Selinexor;KPT-330;Ribavirin;JAK2_Inhibitor_V;Alprenolol;Nylidrin_hydrochloride;Tulobuterol_hydrochloride;Sodium_Glucuronic_Acid;Chloropyramine_hydrochloride;Triciribine;Cyclocytidine_hydrochloride;PAOA;SR1001;Levomilnacipran;Carbadox;Chloramphenicol;Prilocaine;Lvguidingan;Senkyunolide_I;Histone_Deacetylase_Inhibitor_III;Clofibrate;Tropicamide;Riboflavin;S-allyl-L-cysteine;Nifuratel;Verdinexor;SR0987;Racecadotril;Clorprenaline_hydrochloride;ONX-0914;Carteolol_hydrochloride;CHIR-090;Iproniazid_Phosphate;Streptozocin;PX-478_2HCl;Trans-Zeatin_Riboside;BH3I-1;Alendronate_sodium_hydrate;Climbazole;Valacyclovir_hydrochloride;Furagin;NIH-12848 | 0.996>Score>=0.995 |
| Linalool;Saclofen;SR-4370;Felbamate;SR_1078;CTEP;Neochlorogenic_acid;Chlorogenic_Acid;U93631;Sotalol_hydrochloride;Clorgyline_hydrochloride;Longdaysin;Genipin;Duloxetine_hydrochloride;Salubrinal;Flutamide;N-Acetyl-D-Glucosamine;Nicaraven;Propitocaine_hydrochloride;Eflornithine_hydrochloride_Monohydrate;PFK-158;Maribavir;pyridoxal_isonicotinoyl_hydrazone;Eprodisate_disodium;Pyridoxal_phosphate;BAY_11-7082;hnps-PLA_Inhibitor;Sodium_ascorbate | 0.995>Score>=0.994 |
| Nadolol;MHP;Chlorophos;Isavuconazole;Famciclovir;MC1568;GSK3787;Risedronic_Acid;Tannic_acid;Nicainoprol;Dimesna;Delta-Gluconolactone;Cariporide;DL-5-Hydroxylysine_hydrochloride;Sal003;Malotilate;Bepridil_hydrochloride;Isoxsuprine_hydrochloride;Risedronate_Sodium;RO4929097;Elesclomol;Eniporide;AR-42;Adiphenine_hydrochloride | 0.994>Score>=0.993 |
| D-Mannosamine_hydrochloride;Decanoic_Acid;Nicorandil;2-PMPA;Etofenamate;Delapril?Hydrochloride;Uridine;Nimustine_Hydrochloride;TH34;Esmolol_hydrochloride;AG1024;Dioxopromethazine_hydrochloride;L-Anserine_nitrate_salt;Melphalan;Palifosfamide;Phenoxybenzamine_hydrochloride;Brivudine;Benserazide_hydrochloride;BML-210;Propranolol_hydrochloride;Rivastigmine;Bufexamac | 0.993>Score>=0.992 |
| RGFP_966;Perindopril_erbumine;STAT5_Inhibitor;Ramipril;10-Hydroxydecanoic_Acid;Epoxomicin;α-D-Glucose;D-Mannose;D(+)-Glucose;D-(+)-ALLOSE;Alpha-D-galactose;Des(benzylpyridyl)_Atazanavi;demethoxycurcumin;Midodrine_hydrochloride;Fipronil;Pyridoxamine_dihydrochloride;Atomoxetine_hydrochloride;1-Deoxynojirimycin;Salbutamol;Belinostat;YM-58483;Nilutamide;Busulfan;Xylitol;L-(-)-Arabitol;L-Carnitine_hydrochloride | 0.992>Score>=0.991 |
| Benfluorex_hydrochloride;GSK-2881078;CGS_27023A;(±)-Methyl_Jasmonate;Thiamphenicol;GS967;Cefuroxime_sodium;RG2833;Clindamycin_HCl;SL-327;Griffonin;Voglibose;XCT790;Florfenicol;Nateglinide;N6022;Nitrofurantoin;Valganciclovir_hydrochloride | 0.991>Score>=0.99 |

**Table S6.** The predicted tripeptide that have high possibility (DFCNN score >=0.99) will bind with the pocket of 2019-nCov_main_protease by DFCNN score.

| **Peptide sequence** | **DNCFF score** |
| --- | --- |
| IKP; IPK;KIP;KPI;PIK;PKI | Score>=0.997 |
| GKL;LGK;LKG;KGL;KLG;GKK;KGK;KKG;AKK;KAK;KKA;KPV;KVP;PKV;PVK;VKP;VPK | 0.997>Score>=0.996 |
| GKI;IGK;IKG;KGI;KIG;LKP;LPK;KLP;KPL;PLK;PKL;LLK;LKL;KLL | 0.996>Score>=0.995 |
| RML;LRM;LMR;MRL;MLR;GKM;GMK;KGM;KMG;MGK;MKG;GKV;GVK;KGV;KVG;VGK;VKG;RKV;RVK;KRV;KVR;VRK;VKR;LKM;LMK;KLM;KML;MLK;MKL;ARK;AKR;RAK;RKA;KAR;KRA;RMM;MRM;MMR;RLK;RKL;LRK;LKR;KRL;KLR;KMM;MKM;MMK;QLK;QKL;LQK;LKQ;KQL;KLQ;AKM;AMK;KAM;KMA;MAK;MKA;RMS;RSM;MRS;MSR;SRM;SMR;RIK;RKI;IRK;IKR;KRI;KIR | 0.995>Score>=0.994 |
| KPK;PKK;RKP;RPK;KRP;KPR;PRK;PKR;RQL;RLQ;QRL;QLR;LRQ;LQR;QQI;QIQ;IQQ;AKP;APK;KAP;KPA;PAK;PKA;GKF;GFK;KGF;KFG;FGK;FKG;NKK;KNK;KKN;KMV;KVM;MKV;MVK;VKM;VMK;QKV;QVK;KQV;KVQ;VQK;VKQ;ALK;AKL;LAK;LKA;KAL;KLA;NLK;NKL;LNK;LKN;KNL;KLN;QIK;QKI;IQK;IKQ;KQI;KIQ;QKM;QMK;KQM;KMQ;MQK;MKQ;LKV;LVK;KLV;KVL;VLK;VKL | 0.994>Score>=0.993 |
| LRL;LLR;KFP;KPF;FKP;FPK;PKF;PFK;IKM;IMK;KIM;KMI;MIK;MKI;NIK;NKI;INK;IKN;KNI;KIN;RKS;RSK;KRS;KSR;SRK;SKR;RKM;RMK;KRM;KMR;MRK;MKR;ILK;IKL;LIK;LKI;KIL;KLI;QQL;QLQ;LQQ;RMP;RPM;MRP;MPR;PRM;PMR;RIM;RMI;IRM;IMR;MRI;MIR;KMS;KSM;MKS;MSK;SKM;SMK | 0.993>Score>=0.992 |
| NMK;KNM;KMN;MNK;MKN;GKP;GPK;KGP;KPG;PGK;PKG;RHM;RMH;HRM;HMR;MRH;MHR;RMV;RVM;MRV;MVR;VRM;VMR;RQI;RIQ;QRI;QIR;IRQ;IQR;RGK;RKG;GRK;GKR;KRG;KGR;QKF;QFK;KQF;KFQ;FQK;FKQ;NKV;NVK;KNV;KVN;VNK;VKN;KMP;KPM;MKP;MPK;PKM;PMK | 0.992>Score>=0.991 |
| KYP;PKY;PYK;YKP;YPK;NKF;NFK;KNF;KFN;FNK;FKN;HKM;HMK;KHM;KMH;MHK;MKH;RHL;RLH;HRL;HLR;LRH;LHR;RMT;RTM;MRT;MTR;TRM;TMR;RQM;RMQ;QRM;QMR;MRQ;MQR;GKT;GTK;KGT;KTG;TGK;TKG;RMF;RFM;MRF;MFR;FRM;FMR;RLP;RPL;LRP;LPR;PRL;PLR;QMF;QFM;MQF;MFQ;FQM;FMQ;QQK;QKQ;KQQ;HKV;HVK;KHV;KVH;VHK;VKH;RLS;RSL;LRS;LSR;SRL;SLR | 0.991>Score>=0.99 |

Figure S1. The alignment of S-protein epitope regions shows high conservation among the patients.


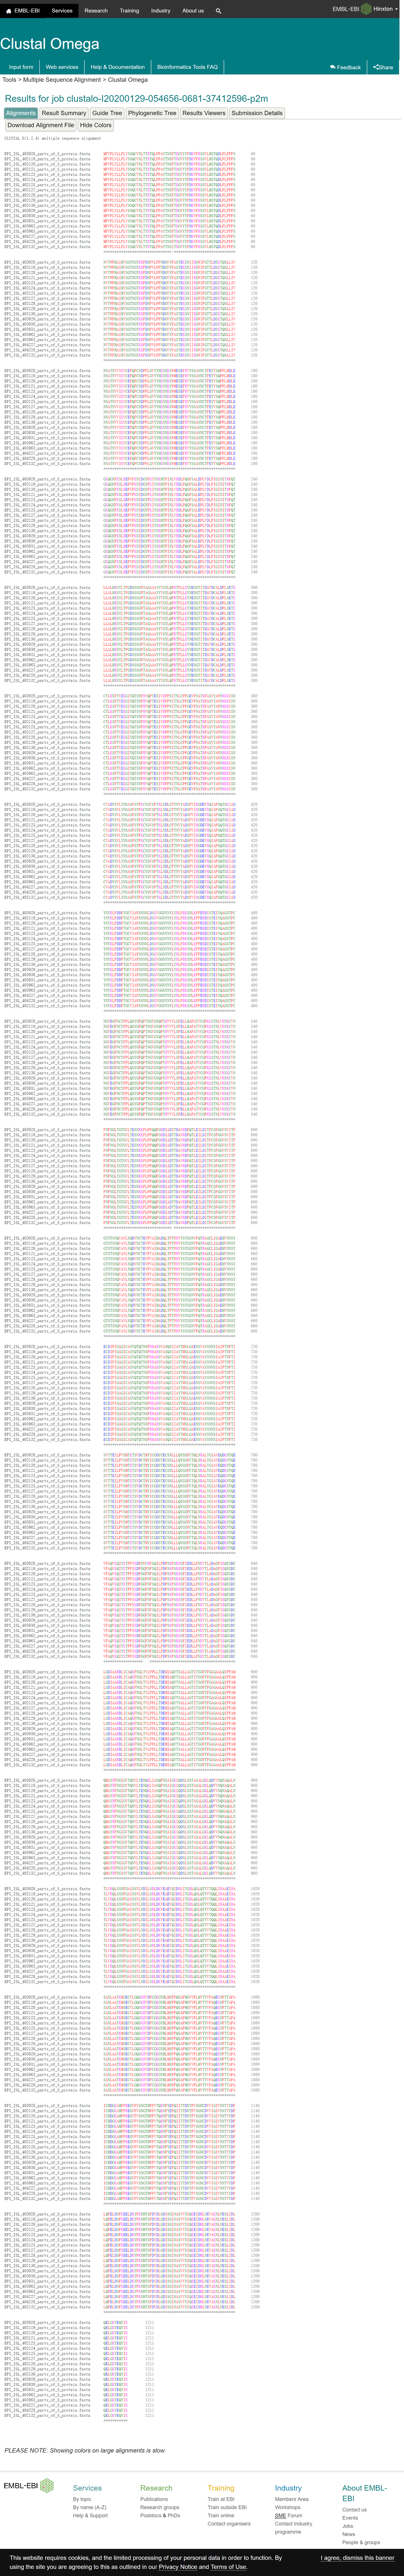


Figure S1 continued:


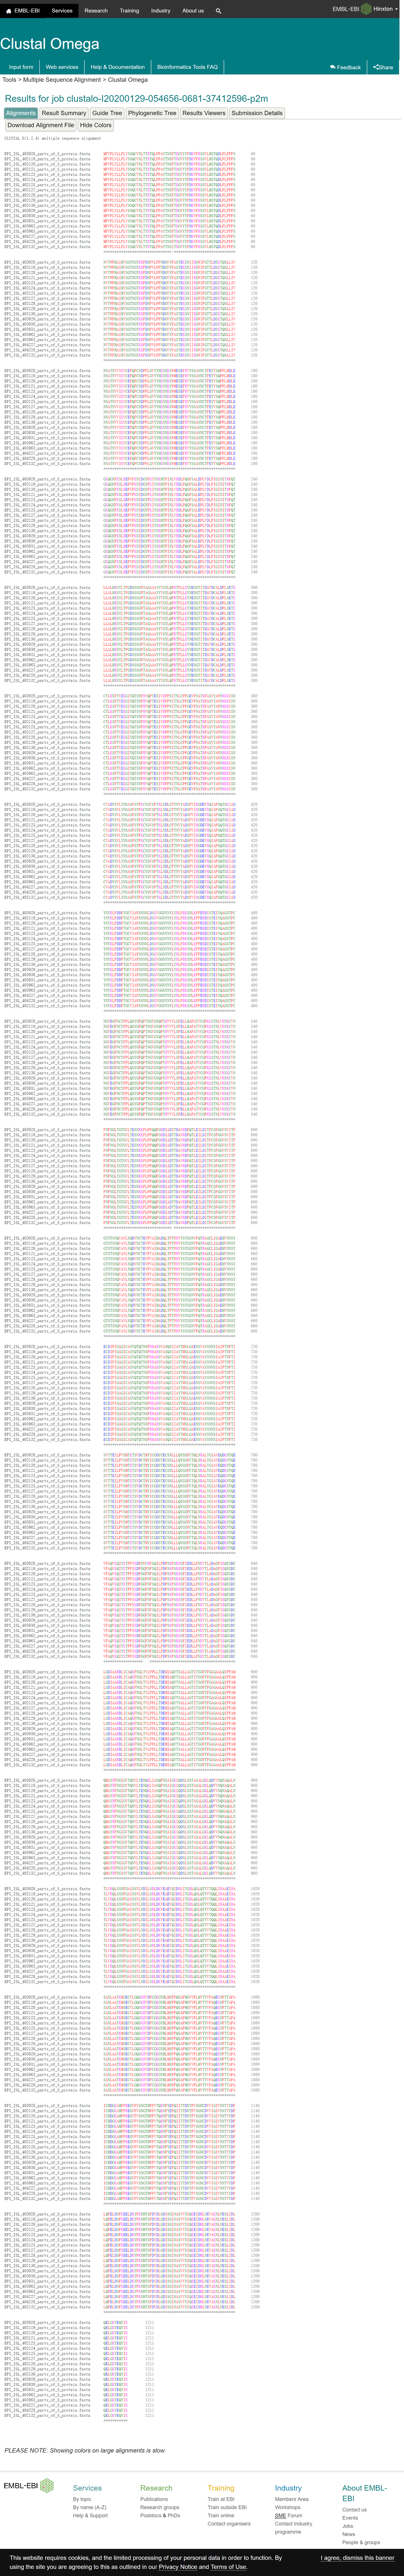


Figure S1 continued:


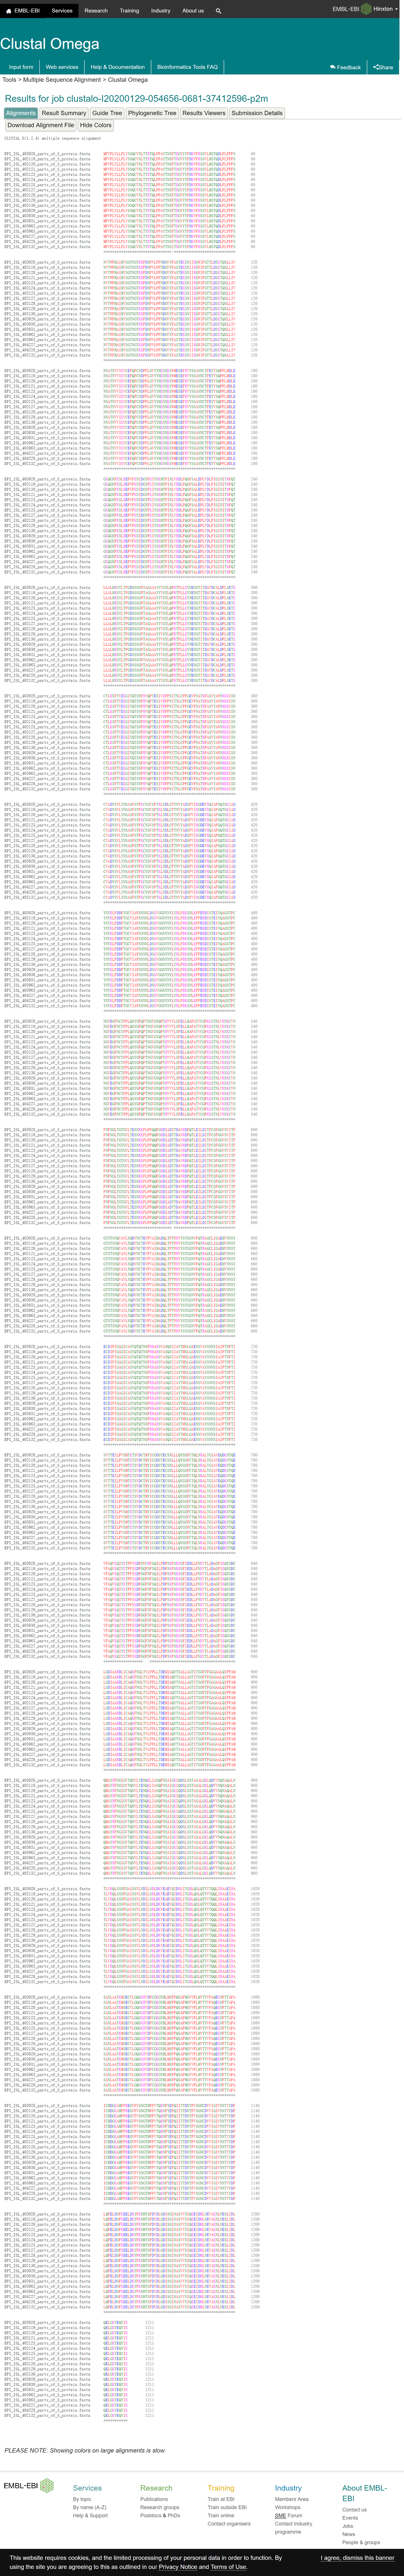


Figure S1 continued:


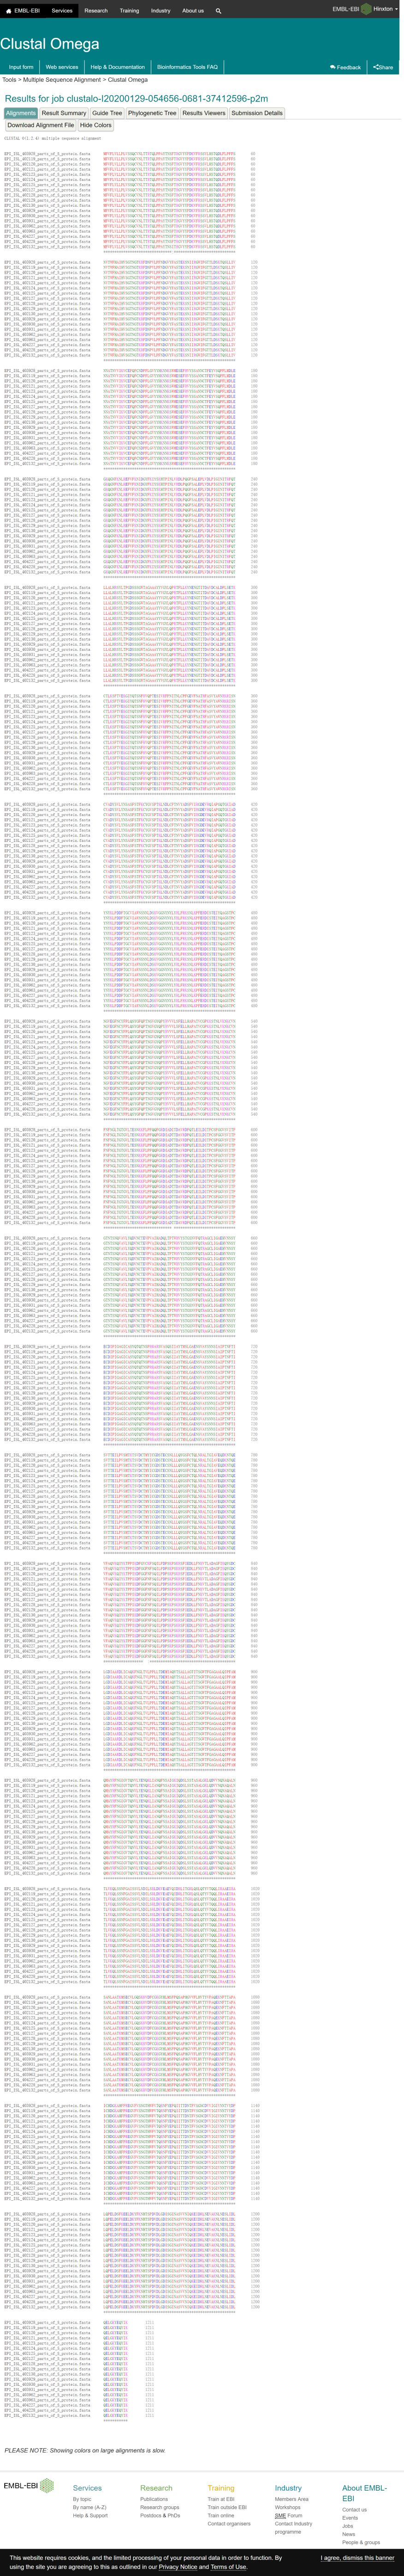

Supplement: Supplementary file 1 [file supplementary]
